# Supplementary material for: Humoral and cellular immune responses to CoronaVac up to one year after vaccination
Source: PubMed Central journal article supplement (PMC9634255; doi:10.3389/fimmu.2022.1032411), 2022-10-21
Supplement: Table_1.pdf [file Table_1.pdf]

**Supplementary Table 1.** Antibodies and fluorochromes used in the activation induced marker (AIM) assay.

| <b>Fluorochrome</b> | <b>AIM T CD4<sup>+</sup> cells</b> | <b>AIM T CD8<sup>+</sup> cells</b> |
|---------------------|------------------------------------|------------------------------------|
| BB515               | CD3 (UCHT1)                        | CD3 (UCHT1)                        |
| APC-H7              | CD4 (RPA-T4)                       | CD4 (RPA-T4)                       |
| PerCP CY5,5         | CD8 (SK1)                          | CD8 (SK1)                          |
| APC                 | CD45RA (HI100)                     | CD45RA (HI100)                     |
| PE-CY7              | CD25 (M-A251)                      | -                                  |
| BV711               | CXCR3 (1C6)                        | CXCR3(1C6)                         |
| BV421               | CCR7 (G043H7)                      | CCR7 (G043H7)                      |
| Alexa Fluor 700     | CD40/CD154 (24-31)                 | -                                  |
| APC-R700            | -                                  | CD38 (HIT2)                        |
| BV510               | CD137 (4B4-1)                      | CD137 (4B4-1)                      |
| BV605               | CXCR5 (RF8B2)                      | -                                  |
| PE                  | OX40 (Ber-ACT35) <sup>a</sup>      | CD69 (FN50)                        |
| PE-CF594            | Live-Dead <sup>b</sup>             | Live-Dead <sup>b</sup>             |

<sup>a</sup>All antibodies were acquired from BD Biosciences, excepting from anti-OX40 (Biolegend). Clones were described in parenthesis. <sup>b</sup>Cell viability marker, Live/Dead, CF-594, Life Technologies
