# Supplementary material for: Humoral and cellular immune responses to CoronaVac up to one year after vaccination
Source: PubMed Central journal article supplement (PMC9634255; doi:10.3389/fimmu.2022.1032411), 2022-10-21
Supplement: Table_2.pdf [file Table_2.pdf]

**Supplementary Table 2.** Biomarkers detected in the electrochemiluminescence binding assays, according to the MSD<sup>®</sup> (Meso Scale Discovery, MD, USA).

| Chemokine Panel |                         | Cytokine Panel |                         | Proinflammatory Panel |                         | Th17 Panel    |                         |
|-----------------|-------------------------|----------------|-------------------------|-----------------------|-------------------------|---------------|-------------------------|
| Biomarkers      | Detection range (pg/mL) | Biomarkers     | Detection range (pg/mL) | Biomarkers            | Detection range (pg/mL) | Biomarkers    | Detection range (pg/mL) |
| Eotaxin         | 12.3 - 1120             | GM-CSF         | 0.842 - 750             | IFN- $\gamma$         | 1.76 - 938              | IL-17A Gen. B | 5.86 - 1950             |
| MIP-1 $\beta$   | 1.88 - 520              | IL-1 $\alpha$  | 2.85 - 278              | IL-1 $\beta$          | 0.646 - 375             | IL-21         | 6.12 - 650              |
| Eotaxin-3       | 10.2 - 3700             | IL-5           | 4.41 - 562              | IL-2                  | 0.890 - 938             | IL-22         | 2.78 - 325              |
| TARC            | 3.32 - 1120             | IL-7           | 0.851 - 563             | IL-4                  | 0.218 - 158             | IL-23         | 4.6 - 3250              |
| IP-10           | 1.37 - 500              | IL-12/IL-23p40 | 1.32 - 2250             | IL-6                  | 0.633 - 488             | IL-27         | 38.7 - 13000            |
| MIP-1 $\alpha$  | 13.8 - 743              | IL-15          | 0.774 - 525             | IL-8 <sup>a</sup>     | 0.591 - 375             | IL-31         | 4.22 - 650              |

## Supplementary Material

|           |             |              |             |               |             |                |             |
|-----------|-------------|--------------|-------------|---------------|-------------|----------------|-------------|
| IL-8 (HA) | 713 - 43400 | IL-16        | 19.1 - 1870 | IL-10         | 0.298 - 233 | MIP-3 $\alpha$ | 0.750 - 325 |
| MCP-1     | 1.09 - 375  | IL-17A*      | 3.19 - 3650 | IL-12p70      | 1.22 - 315  | -              | -           |
| MDC       | 88.3 - 3700 | TNF- $\beta$ | 0.465 - 458 | IL-13         | 4.21 - 353  | -              | -           |
| MCP-4     | 10 - 469    | VEGF-A       | 7.70 - 562  | TNF- $\alpha$ | 0.690 - 248 | -              | -           |

---

<sup>a</sup>IL-8 from the Proinflammatory Panel and IL-17A from Cytokine Panel were excluded from the analysis due to being repeated in the Chemokine Panel and Th17 Panel, respectively. According to the manufacturer, IL-8 (HA) from the Chemokine Panel is validated and its use is recommended when high levels are anticipated and IL-17A Gen B is optimized for a more sensitive detection in multiple sample types, such as serum, plasma, urine, cell culture supernatants, and PBMCs.
